# Supplementary material for: Comparison of the Effectiveness of Lifestyle Modification with Other Treatments on the Incidence of Type 2 Diabetes in People at High Risk: A Network Meta-Analysis
Source: MDPI journal article supplement (doi:10.3390/nu11061373), 2019-06-19
Supplement: s1 [file s1]

|                        | Published year | Reference number | Random sequence generation | Allocation concealment | Blinding of participants and personnel | Blinding of outcome assessment | Incomplete outcome data | Selective reporting | Overall Judgement |
|------------------------|----------------|------------------|----------------------------|------------------------|----------------------------------------|--------------------------------|-------------------------|---------------------|-------------------|
| Pan, Da Qing           | 1997           | 21               | ?                          | ?                      | -                                      | +                              | ?                       | ?                   | H                 |
| Fracog                 | 1999           | 22               | ?                          | +                      | -                                      | +                              | +                       | ?                   | L                 |
| Li                     | 1999           | 23               | ?                          | +                      | +                                      | +                              | -                       | +                   | M                 |
| Heymselfield           | 2000           | 24               | ?                          | -                      | -                                      | +                              | -                       | -                   | H                 |
| Lindström, DPS         | 2003           | 25               | +                          | +                      | -                                      | +                              | +                       | +                   | L                 |
| Oldroyd                | 2006           | 34               | +                          | +                      | -                                      | ?                              | +                       | ?                   | M                 |
| Chiasson, STOP-NIDDM   | 2002           | 26               | +                          | +                      | +                                      | +                              | +                       | +                   | L                 |
| Knower, DPP            | 2002           | 27               | ?                          | +                      | -                                      | +                              | +                       | +                   | L                 |
| Liao                   | 2002           | 28               | +                          | +                      | -                                      | +                              | +                       | ?                   | L                 |
| Watanabe               | 2003           | 29               | +                          | +                      | -                                      | +                              | +                       | +                   | M                 |
| Tao                    | 2004           | 30               | -                          | -                      | -                                      | ?                              | ?                       | ?                   | H                 |
| Fan                    | 2005           | 31               | +                          | ?                      | ?                                      | ?                              | +                       | ?                   | H                 |
| Torgerson, XENDOS      | 2004           | 32               | ?                          | +                      | ?                                      | +                              | +                       | +                   | M                 |
| Kosaka                 | 2005           | 33               | ?                          | -                      | -                                      | +                              | +                       | ?                   | H                 |
| DREAM                  | 2006           | 35               | +                          | +                      | +                                      | +                              | +                       | +                   | L                 |
| Eriksson, MARMO        | 2006           | 36               | ?                          | -                      | +                                      | +                              | +                       | ?                   | M                 |
| Ramachandr, IDPP       | 2006           | 37               | ?                          | +                      | -                                      | +                              | +                       | ?                   | L                 |
| Roumen, SLIM           | 2008           | 38               | +                          | +                      | -                                      | +                              | +                       | +                   | M                 |
| Kawahara               | 2008           | 39               | +                          | +                      | -                                      | +                              | ?                       | +                   | L                 |
| Kawamori               | 2009           | 40               | +                          | +                      | +                                      | +                              | +                       | +                   | M                 |
| Penn, EDIPS            | 2009           | 41               | +                          | +                      | +                                      | +                              | +                       | +                   | L                 |
| Ramachandran, IDPP     | 2009           | 42               | +                          | +                      | +                                      | +                              | +                       | +                   | M                 |
| Yates                  | 2009           | 43               | +                          | +                      | -                                      | +                              | +                       | ?                   | M                 |
| Zinman                 | 2010           | 44               | +                          | +                      | +                                      | +                              | +                       | +                   | L                 |
| DeFronzo               | 2011           | 45               | +                          | +                      | +                                      | +                              | +                       | +                   | L                 |
| Gagnon                 | 2011           | 46               | +                          | ?                      | -                                      | +                              | +                       | ?                   | M                 |
| Lu                     | 2011           | 47               | ?                          | ?                      | -                                      | +                              | +                       | ?                   | H                 |
| Lu                     | 2011           | 47               | ?                          | ?                      | -                                      | +                              | +                       | ?                   | H                 |
| Salas-Salvado, PREDMED | 2011           | 48               | ?                          | ?                      | -                                      | +                              | ?                       | ?                   | L                 |
| Sakane                 | 2011           | 49               | +                          | ?                      | -                                      | +                              | ?                       | ?                   | M                 |
| Zhou                   | 2011           | 50               | ?                          | ?                      | -                                      | +                              | ?                       | ?                   | H                 |
| Saito, FINT            | 2011           | 51               | +                          | +                      | -                                      | +                              | ?                       | ?                   | H                 |
| Oskene                 | 2012           | 52               | ?                          | ?                      | -                                      | +                              | +                       | +                   | M                 |
| Vermunt                | 2012           | 53               | ?                          | ?                      | -                                      | +                              | +                       | ?                   | H                 |
| Odawara, JDPP?         | 2013           | 54               | ?                          | +                      | +                                      | +                              | +                       | +                   | M                 |
| Wong                   | 2013           | 55               | +                          | +                      | -                                      | +                              | +                       | ?                   | L                 |
| Xu                     | 2012           | 56               | +                          | ?                      | -                                      | +                              | ?                       | ?                   | H                 |
| Fang                   | 2014           | 57               | ?                          | ?                      | -                                      | +                              | ?                       | ?                   | H                 |
| Lian                   | 2014           | 58               | +                          | +                      | -                                      | +                              | +                       | +                   | M                 |
| Weber, DCLIP           | 2016           | 59               | +                          | +                      | -                                      | +                              | +                       | +                   | M                 |

+' Low risk of bias, '-' High risk of bias, '?' Unclear
