# Supplementary material for: Comparison of the Effectiveness of Lifestyle Modification with Other Treatments on the Incidence of Type 2 Diabetes in People at High Risk: A Network Meta-Analysis
Source: MDPI journal article supplement (doi:10.3390/nu11061373), 2019-06-19

## Figure S2. Funnel plots

a) Funnel plot for lifestyle modification effects on the onset of type 2 diabetes.

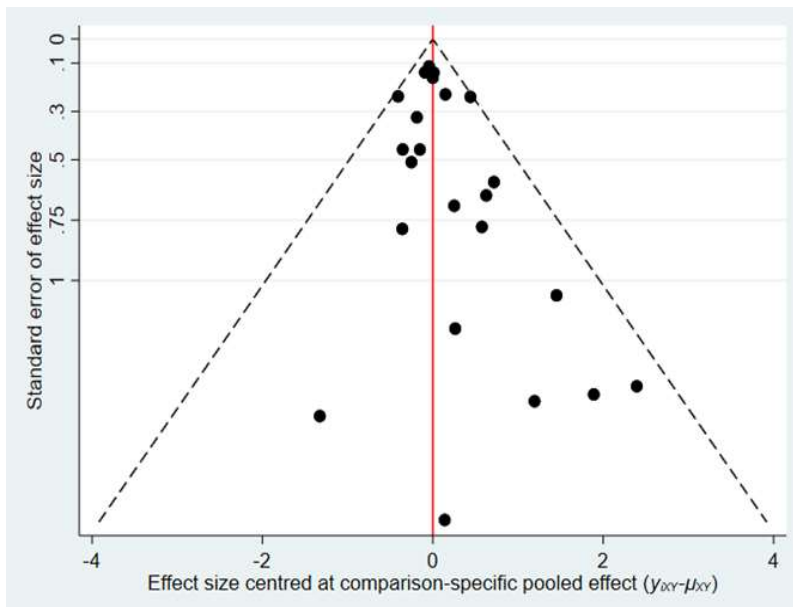

b) Filled funnel plot with pseudo 95% confidence limits using trim and fill method for lifestyle modification effects on the onset of type 2 diabetes.

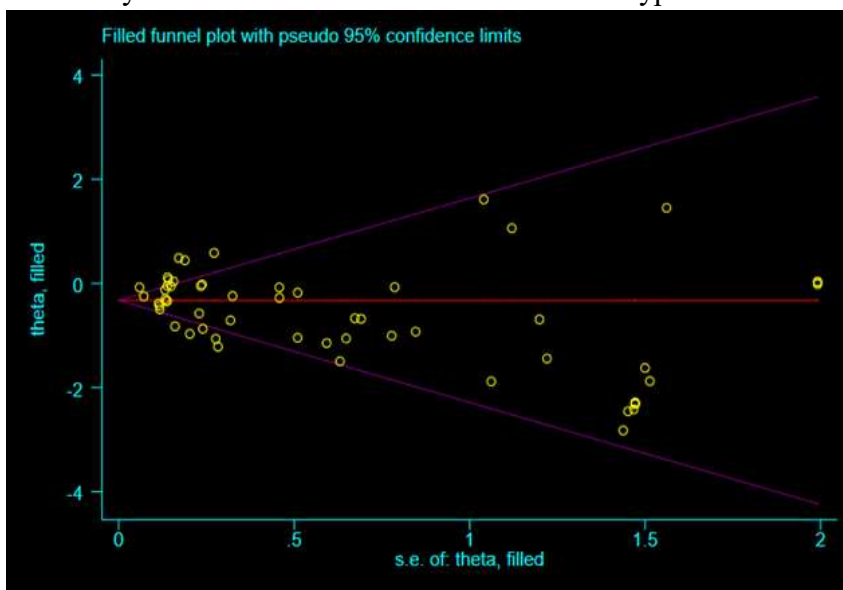

Supplement: s1 [file s1]
