# Supplementary material for: Comparison of the Effectiveness of Lifestyle Modification with Other Treatments on the Incidence of Type 2 Diabetes in People at High Risk: A Network Meta-Analysis
Source: MDPI journal article supplement (doi:10.3390/nu11061373), 2019-06-19
Supplement: s1 [file s1]

Table S4. NMA for separating Mediterranean diet from Diet intervention using 1yr and full follow-up study duration with BMI groups (frequentist approach, random-effect model)

|                                                                                                                                                       | 1Yr with<br>Mediterranean | Full yr with<br>Mediterranean | Full yr with<br>Mediterranean<br>(BMI<30) | Full yr with<br>Mediterranean<br>(BMI>=30) |
|-------------------------------------------------------------------------------------------------------------------------------------------------------|---------------------------|-------------------------------|-------------------------------------------|--------------------------------------------|
|                                                                                                                                                       | OR [95% CI]               | OR [95% CI]                   | OR [95% CI]                               | OR [95% CI]                                |
| <b>Comparison for Lifestyle</b>                                                                                                                       |                           |                               |                                           |                                            |
| Lifestyle vs. Exercise (indirect)                                                                                                                     | 1.18 [0.74, 1.93]         | 1.13 [0.75, 1.83]             | 1.10 [0.87, 1.40]                         | -                                          |
| Lifestyle vs. Diet (indirect)                                                                                                                         | 0.90 [0.59, 1.40]         | 0.88 [0.60, 1.28]             | <b>0.64 [0.56, 0.73]</b>                  | -                                          |
| Lifestyle vs. Mediterranean diet                                                                                                                      | 2.56 [0.22, 30.3]         | 1.06 [0.54, 2.12]             | -                                         | 0.96 [0.32, 2.91]                          |
| Lifestyle vs. Orlistat (indirect)                                                                                                                     | 1.19 [0.55, 2.58]         | 0.91 [0.54, 1.53]             | -                                         | 0.82 [0.38, 1.79]                          |
| Lifestyle vs. Acarbose/Voglibose (indirect)                                                                                                           | 0.92 [0.57, 1.48]         | 0.84 [0.56, 1.25]             | 1.27 [0.36, 4.42]                         | 0.68 [0.25, 1.83]                          |
| Lifestyle vs. Metformin/Flumamine (indirect)                                                                                                          | 0.86 [0.60, 1.25]         | 0.73 [0.60, 1.05]             | 0.89 [0.73, 1.10]                         | 0.73 [0.34, 1.56]                          |
| Lifestyle vs. Pioglitazon, Rosiglitazone (indirect)                                                                                                   | 0.57 [0.32, 1.00]         | 0.57 [0.36, 1.29]             | 0.61 [0.17, 2.15]                         | 0.68 [0.26, 1.78]                          |
| Lifestyle vs. Pitavastatin (indirect)                                                                                                                 | 0.68 [0.36, 1.29]         | 0.72 [0.42, 1.24]             | 0.79 [0.59, 1.05]                         | -                                          |
| Lifestyle vs. Glipizide (indirect)                                                                                                                    | 2.07 [0.24, 17.86]        | 2.16 [0.26, 17.86]            | 2.90 [0.27, 31.25]                        | -                                          |
| Lifestyle vs. Herbal medicine (indirect)                                                                                                              | 0.71 [0.38, 1.36]         | 0.74 [0.43, 1.28]             | 0.98 [0.28, 3.44]                         | -                                          |
| Lifestyle vs. Standard                                                                                                                                | <b>0.60 [0.48, 0.76]</b>  | <b>0.59 [0.49, 0.70]</b>      | <b>0.64 [0.56, 0.73]</b>                  | <b>0.53 [0.30, 0.94]</b>                   |
| Lifestyle vs. Placebo                                                                                                                                 | <b>0.41 [0.27, 0.63]</b>  | <b>0.43 [0.31, 0.61]</b>      | 0.58 [0.17, 1.97]                         | <b>0.40 [0.19, 0.82]</b>                   |
| <b>Comparison with Standard</b>                                                                                                                       |                           |                               |                                           |                                            |
| Diet vs. Standard                                                                                                                                     | 0.67 [0.44, 1.01]         | <b>0.67 [0.46, 0.95]</b>      | <b>0.68 [0.55, 0.83]</b>                  | -                                          |
| Mediterranean diet vs. Standard                                                                                                                       | 0.24 [0.02, 2.73]         | 0.55 [0.28, 1.07]             |                                           | 0.55 [0.21, 1.42]                          |
| Exercise vs. Standard                                                                                                                                 | <b>0.51 [0.32, 0.81]</b>  | <b>0.52 [0.34, 0.78]</b>      | <b>0.58 [0.47, 0.72]</b>                  | -                                          |
| Orlistat vs. Standard                                                                                                                                 | 0.51 [0.24, 1.07]         | 0.64 [0.39, 1.05]             | -                                         | 0.64 [0.36, 1.14]                          |
| Acarbose/Voglibose vs. Standard                                                                                                                       | 0.66 [0.42, 1.04]         | 0.70 [0.48, 1.05]             | 0.50 [0.15, 1.75]                         | 0.78 [0.35, 1.76]                          |
| Metformin/Flumamine vs. Standard                                                                                                                      | 0.70 [0.48, 1.03]         | <b>0.74 [0.56, 0.98]</b>      | <b>0.72 [0.60, 0.86]</b>                  | 0.72 [0.29, 1.80]                          |
| Pioglitazon, Rosiglitazone vs. Standard (indirect)                                                                                                    | 0.66 [0.42, 1.04]         | 1.02 [0.64, 1.62]             | 1.05 [0.30, 3.66]                         | 0.77 [0.26, 2.27]                          |
| Pitavastatin vs. Standard                                                                                                                             | 0.88 [0.49, 1.59]         | 0.81 [0.49, 1.35]             | 0.81 [0.63, 1.05]                         | -                                          |
| Glipizide vs. Standard (indirect)                                                                                                                     | 0.29 [0.03, 2.51]         | 0.27 [0.03, 2.24]             | 0.22 [0.02, 2.37]                         | -                                          |
| Herbal medicine vs. Standard (indirect)                                                                                                               | 0.85 [0.44, 1.61]         | 0.79 [0.46, 1.37]             | 0.66 [0.19, 2.29]                         | -                                          |
| Placebo vs. Standard (indirect)                                                                                                                       | 1.46 [0.95, 2.25]         | 1.36 [0.96, 1.91]             | 1.10 [0.33, 3.73]                         | 1.33 [0.55, 3.21]                          |
| <b>Comparison with Placebo</b>                                                                                                                        |                           |                               |                                           |                                            |
| Diet vs. Placebo (indirect)                                                                                                                           | <b>0.46 [0.26, 0.82]</b>  | <b>0.49 [0.30, 0.80]</b>      | 0.62 [0.18, 2.11]                         | -                                          |
| Mediterranean diet vs. Placebo (indirect)                                                                                                             | 0.16 [0.01, 1.94]         | <b>0.41 [0.19, 0.86]</b>      | -                                         | 0.41 [0.11, 1.50]                          |
| Exercise vs. Placebo (indirect)                                                                                                                       | <b>0.35 [0.19, 0.64]</b>  | <b>0.38 [0.23, 0.65]</b>      | 0.53 [0.15, 1.81]                         | -                                          |
| Orlistat vs. Placebo                                                                                                                                  | <b>0.35 [0.15, 0.79]</b>  | <b>0.48 [0.27, 0.85]</b>      | -                                         | 0.48 [0.18, 1.28]                          |
| Acarbose/Voglibose vs. Placebo                                                                                                                        | <b>0.45 [0.28, 0.74]</b>  | <b>0.52 [0.34, 0.77]</b>      | <b>0.46 [0.33, 0.63]</b>                  | 0.59 [0.18, 1.94]                          |
| Metformin/Flumamine vs Placebo                                                                                                                        | <b>0.48 [0.32, 0.71]</b>  | <b>0.55 [0.39, 0.76]</b>      | 0.65 [0.19, 2.17]                         | 0.54 [0.29, 1.01]                          |
| Pioglitazon, Rosiglitazone vs. Placebo                                                                                                                | 0.73 [0.50, 1.05]         | 0.75 [0.55, 1.04]             | 0.95 [0.71, 1.27]                         | 0.58 [0.31, 1.10]                          |
| Pitavastatin vs. Placebo (indirect)                                                                                                                   | 0.60 [0.29, 1.25]         | 0.60 [0.33, 1.10]             | 0.73 [0.21, 2.55]                         | -                                          |
| Glipizide vs. Placebo                                                                                                                                 | 0.20 [0.02, 1.64]         | 0.20 [0.02, 1.61]             | 0.20 [0.03, 1.54]                         | -                                          |
| Herbal medicine (Juantang bushen recipe, Tianqi) vs. Placebo                                                                                          | <b>0.58 [0.34, 0.93]</b>  | <b>0.58 [0.38, 0.90]</b>      | <b>0.59 [0.44, 0.80]</b>                  | -                                          |
| Log Likelihood Ratio/p-values for inconsistency                                                                                                       |                           |                               |                                           |                                            |
| X <sup>2</sup> =7.74, p=0.74 (df= 11) X <sup>2</sup> =7.70, p=0.74 (df= 11) X <sup>2</sup> =9.06, p=0.43 (df= 9) X <sup>2</sup> =1.58, p=0.45 (df= 2) |                           |                               |                                           |                                            |

For NMA with random effects model

Herbal medicine includes Juantang bushen recipe, and Tianqi.
