# Supplementary material for: Comparison of the Effectiveness of Lifestyle Modification with Other Treatments on the Incidence of Type 2 Diabetes in People at High Risk: A Network Meta-Analysis
Source: MDPI journal article supplement (doi:10.3390/nu11061373), 2019-06-19
Supplement: s1 [file s1]

Table S1. Inclusion criteria for the meta-analysis (PICO)

| PICO                 | Description                                                                                                                                                                                                                                                                                                                                                                                                                                                                             |
|----------------------|-----------------------------------------------------------------------------------------------------------------------------------------------------------------------------------------------------------------------------------------------------------------------------------------------------------------------------------------------------------------------------------------------------------------------------------------------------------------------------------------|
| <b>P</b> opulation   | Patients who were at high risk of type 2 diabetes. (Defined as IGT or IFG. In addition to IGT or IFG, patients with overweight or obesity were included).                                                                                                                                                                                                                                                                                                                               |
| <b>I</b> ntervention | Lifestyle modification (combined diet and exercise) [L], dietary intervention alone [D], exercise intervention [E], Orlistat [O], metformin (or flumamine) [M], acarbose and voglibose [A], pioglitazon and rosiglitazone [T], pitavastatin [PI], glipizide [G,SU], herbal medicines such as the Jiangtang bushen recipe or Tianqi [H].<br>Mediterranean diet was treated as dietary interventions but in the additional analysis it was also conducted as an independent intervention. |
| <b>C</b> omparison   | Standard nutritional recommendations [S] or no treatment including placebo [P]                                                                                                                                                                                                                                                                                                                                                                                                          |
| <b>O</b> utcome      | Number of type 2 diabetes at 1-year follow-up                                                                                                                                                                                                                                                                                                                                                                                                                                           |
