# Supplementary material for: Comparison of the Effectiveness of Lifestyle Modification with Other Treatments on the Incidence of Type 2 Diabetes in People at High Risk: A Network Meta-Analysis
Source: Nutrients. 2019 Jun 19;11(6):1373. doi: 10.3390/nu11061373 (PMC6627198; doi:10.3390/nu11061373)
Supplement: Supplementary file 1 [file nutrients-11-01373-s001.zip]

Archive with 6 entries (6 files):
- nutrients-507499-tableS1.pdf
- nutrients-507499-tableS2.pdf
- nutrients-507499-tableS3.pdf
- nutrients-507499-tableS4.pdf
- nutrients-507499-figure S1.pdf
- nutrients-507499-figure S2.pdf
